# Supplementary material for: Palliative care needs and utilisation of specialist services for people diagnosed with motor neuron disease: a national population-based study
Source: HighWire-hosted journal article supplement (doi:10.1136/bmjopen-2023-082628), 2024-08-01
Supplement: bmjopen-2023-082628supp001_data_supplement.pdf [file bmjopen-2023-082628supp001_data_supplement.pdf]

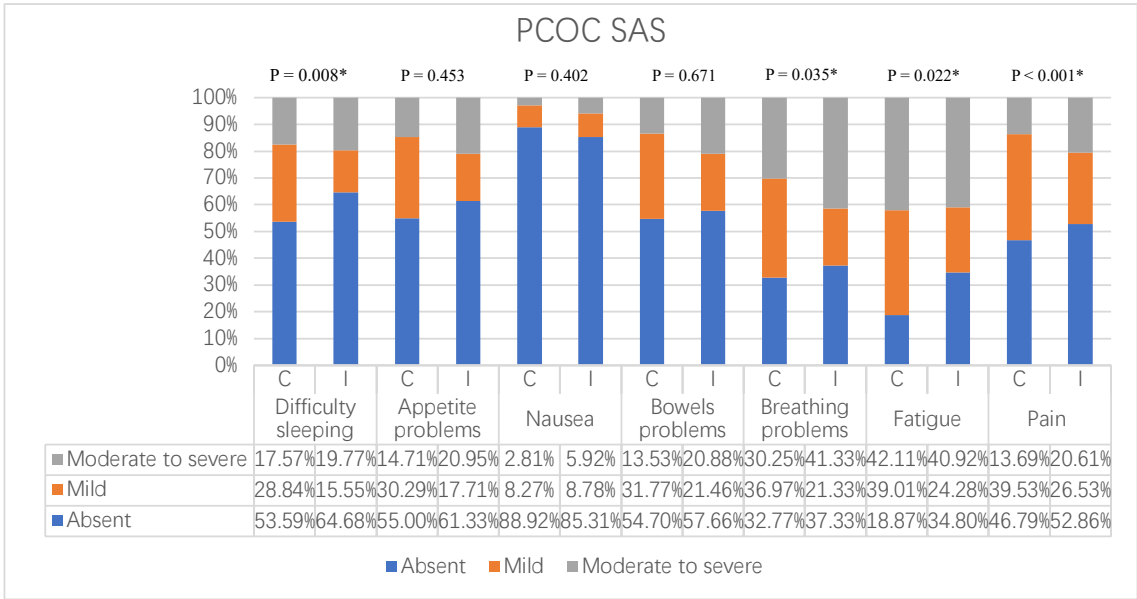

Figure S1. Distribution for levels of distress associated with patient-reported SAS symptoms

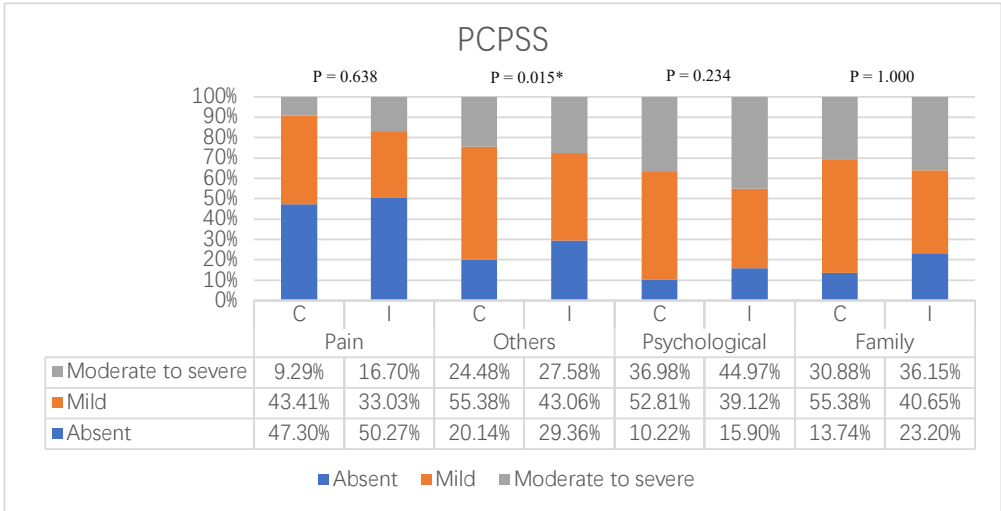

Figure S2. Distribution for levels of clinician-rated palliative care problems

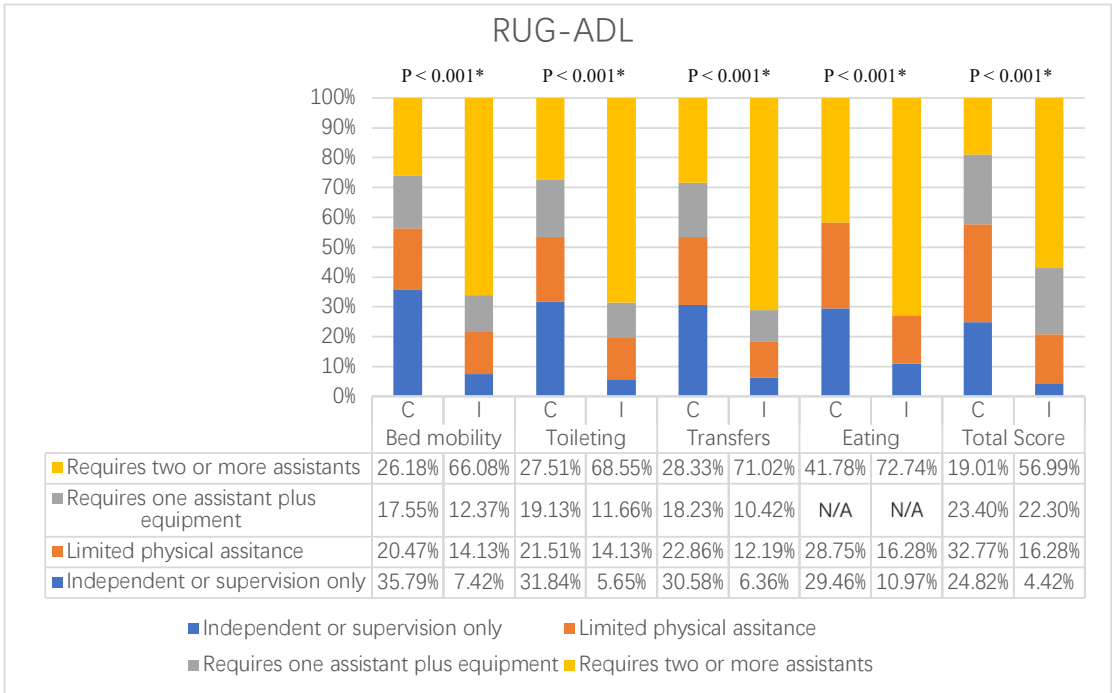

**Figure S3.** *Distribution for levels of clinician-rated level of dependency*

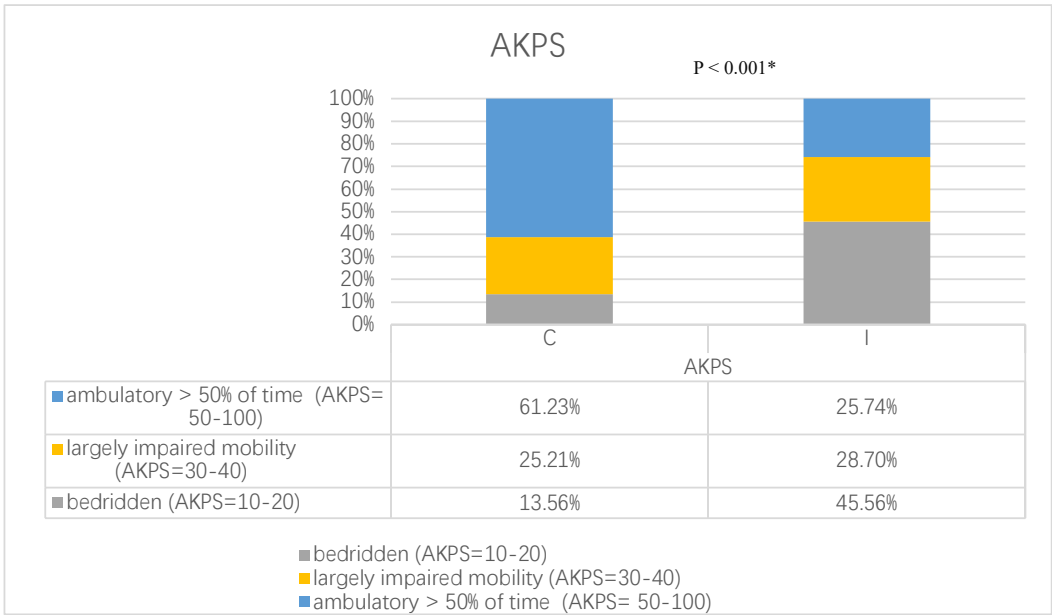

**Figure S4.** *Distribution for levels of clinician-rated performance status*

*For figures S1-4:*

*Abbreviations: C: Community patients; I: Inpatients*

*NOTE. \* indicates significant value  $p < 0.05$ .*

*Comparisons of distributions between community patients and inpatients were performed using Pearson's Chi-square test*
